# Supplementary material for: High-Tc superconductivity of polyhydride Rb2MgH18 with a layered hydrogen structure at high pressure
Source: Royal Society of Chemistry journal article supplement (doi:10.1039/d3tc02427j), 2023-01-01
Supplement: d3tc02427j1.pdf [file d3tc02427j1.pdf]

## Supporting information for

# High- $T_c$ superconductivity of polyhydride $\text{Rb}_2\text{MgH}_{18}$ with a layered hydrogen structure at high pressure

Jianyun Wang<sup>1</sup>, Ying Sun<sup>1</sup>, Yulong Li<sup>2</sup>, Shoutao Zhang<sup>3,\*</sup>, Bo Gao<sup>4,\*</sup>, and Hanyu Liu<sup>1,5\*</sup>

<sup>1</sup>*State Key Laboratory of Superhard Materials and Key Laboratory of Material Simulation Methods & Software of Ministry of Education, College of Physics, Jilin University, Changchun 130012, China*

<sup>2</sup>*Beijing Institute of Space Launch Technology, Beijing 10076, China*

<sup>3</sup>*Key Laboratory of UV-Emitting Materials and Technology of Ministry of Education, School of Physics, Northeast Normal University, Changchun 130024, China*

<sup>4</sup>*Key Laboratory of Automobile Materials of MOE and College of Materials Science and Engineering, Jilin University, Changchun 130012, China*

<sup>5</sup>*International Center of Future Science, Jilin University, Changchun 130012, China*

*E-mail address: zhangst966@nenu.edu.cn, gaobo@calypso.cn, hanyuliu@jlu.edu.cn*

Table S1 Proposed possible reactions for synthesizing the Rb<sub>2</sub>MgH<sub>18</sub> phase and corresponding formation enthalpies at 250 GPa.

| Reaction                                                                             | Formation enthalpy<br>(meV/atom) |
|--------------------------------------------------------------------------------------|----------------------------------|
| $\text{MgH}_2 + 2\text{RbH} + 7\text{H}_2 \rightarrow \text{Rb}_2\text{MgH}_{18}$    | -53.2                            |
| $\text{MgH}_4 + 2\text{RbH} + 6\text{H}_2 \rightarrow \text{Rb}_2\text{MgH}_{18}$    | -34.8                            |
| $\text{MgH}_{12} + 2\text{RbH} + 2\text{H}_2 \rightarrow \text{Rb}_2\text{MgH}_{18}$ | -21.9                            |
| $\text{MgH}_{16} + 2\text{RbH} \rightarrow \text{Rb}_2\text{MgH}_{18}$               | -19.8                            |

Table S2 Predicted structures of Rb<sub>2</sub>MgH<sub>18</sub> at pressure of 250 GPa.

|               | Lattice parameter                                                                                                                                             | Atom coordinates                                                                                                                                                                                                                                                                                                                                                                                                                                                                                                                                                                                                                                                                                                                                                                                                              |
|---------------|---------------------------------------------------------------------------------------------------------------------------------------------------------------|-------------------------------------------------------------------------------------------------------------------------------------------------------------------------------------------------------------------------------------------------------------------------------------------------------------------------------------------------------------------------------------------------------------------------------------------------------------------------------------------------------------------------------------------------------------------------------------------------------------------------------------------------------------------------------------------------------------------------------------------------------------------------------------------------------------------------------|
| <i>P1</i>     | $a = 2.611 \text{ \AA}$<br>$b = 2.671 \text{ \AA}$<br>$c = 9.574 \text{ \AA}$<br>$\alpha = 97.077^\circ$<br>$\beta = 96.272^\circ$<br>$\gamma = 61.057^\circ$ | Rb(1a) 0.308999, 0.482208, 0.851413<br>Rb(1a) 0.376345, 0.574038, 0.131486<br>Mg(1a) 0.468237, 0.728198, 0.526023<br>H(1a) 0.407778, 0.658143, 0.345924<br>H(1a) 0.625895, 0.282581, 0.361020<br>H(1a) 0.875123, 0.695917, 0.283366<br>H(1a) 0.083008, 0.267492, 0.275114<br>H(1a) 0.242859, 0.025964, 0.337723<br>H(1a) 0.718381, 0.000533, 0.255991<br>H(1a) 0.965228, 0.210737, 0.991216<br>H(1a) 0.344581, 0.026805, 0.991495<br>H(1a) 0.723617, 0.842978, 0.991605<br>H(1a) 0.818594, 0.088547, 0.569746<br>H(1a) 0.400448, 0.323413, 0.639217<br>H(1a) 0.054104, 0.518181, 0.646444<br>H(1a) 0.882821, 0.128969, 0.717299<br>H(1a) 0.219383, 0.958407, 0.703857<br>H(1a) 0.654433, 0.738941, 0.701409<br>H(1a) 0.961393, 0.643178, 0.410106<br>H(1a) 0.125010, 0.350163, 0.457064<br>H(1a) 0.743661, 0.069940, 0.427942 |
| <i>P6/mmm</i> | $a = 5.093 \text{ \AA}$<br>$c = 5.138 \text{ \AA}$<br>$\alpha = 90^\circ$<br>$\beta = 90^\circ$<br>$\gamma = 120^\circ$                                       | Rb(3g) 0.50000, 0.00000, 0.50000<br>Rb(1a) 0.00000, 0.00000, 0.00000<br>Mg(2c) 0.66667, 0.33333, 0.00000<br>H(12o) 0.10233, 0.20465, 0.35081<br>H(12o) 0.60208, 0.80104, 0.20482<br>H(12n) 0.61680, 0.61680, 0.86765                                                                                                                                                                                                                                                                                                                                                                                                                                                                                                                                                                                                          |

Table S3 H-H bond lengths and volumes of unit cell of  $P6/mmm$   $Rb_2MgH_{18}$  at 235 GPa calculated using PBE<sup>1</sup> and SCAN<sup>2</sup> functionals.

|               | PBE                   | SCAN                 |
|---------------|-----------------------|----------------------|
| <b>H1-H1</b>  | 0.91 Å                | 0.89 Å               |
| <b>H2-H3</b>  | 1.05 Å                | 1.04 Å               |
| <b>H1-H2</b>  | 1.15 Å                | 1.17 Å               |
| <b>H3-H3</b>  | 1.20 Å                | 1.21 Å               |
| <b>Volume</b> | 117.89 Å <sup>3</sup> | 118.0 Å <sup>3</sup> |

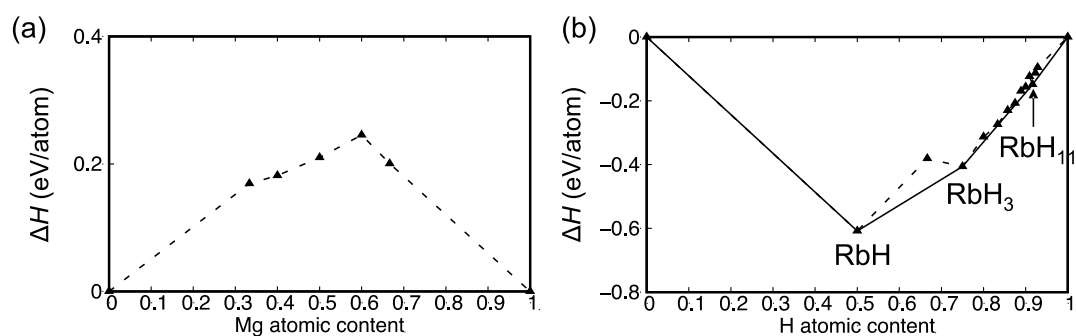

Fig. S1 Calculated convex hulls of (a) Rb-Mg and (b) Rb-H compounds at the pressure of 250 GPa.

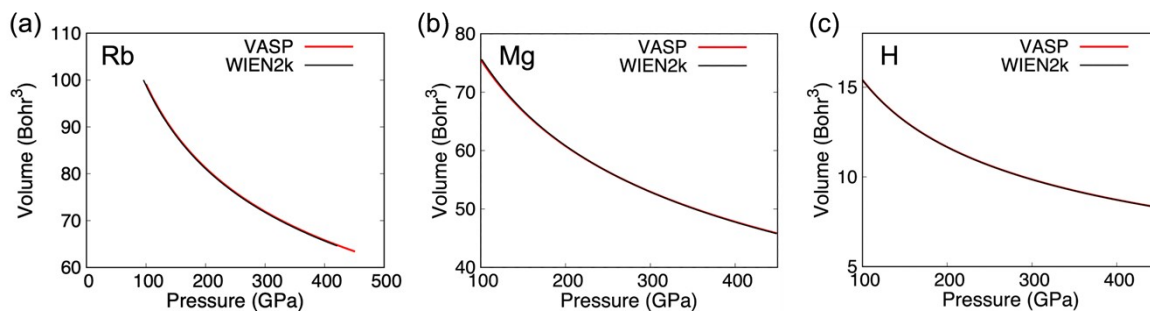

Fig. S2 Calculated equations of states for stable elemental phases of (a) Rb, (b) Mg, and (c) H with unit cells under high pressure using VASP and WIEN2K software.

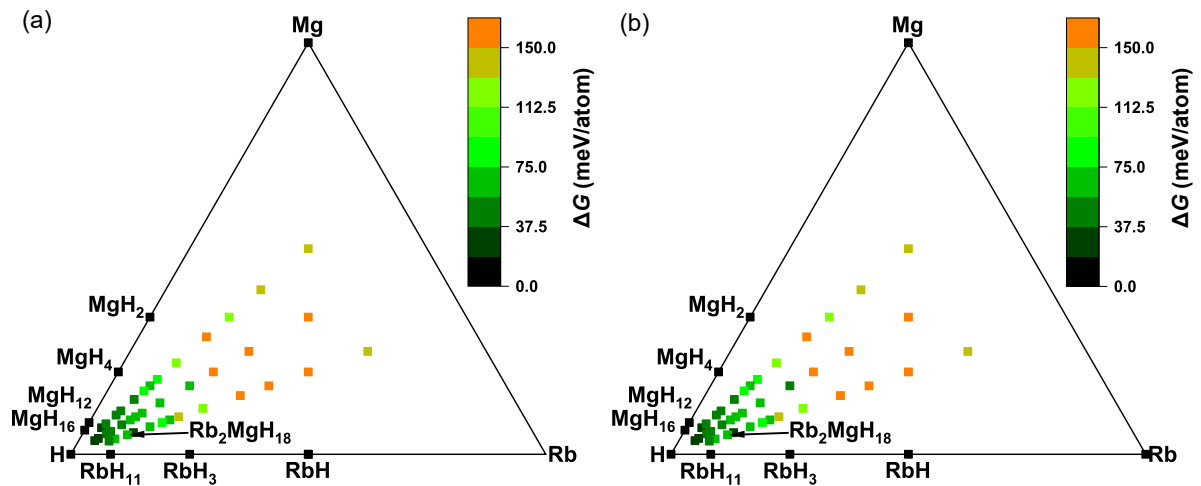

Fig. S3 Phase diagrams of  $\text{Rb}_x\text{Mg}_y\text{H}_z$  compounds relative to Rb, Mg, and H at (a) 180 K and 250 GPa, and (b) 280 K and 250 GPa. Black solid squares represent the stable phases, and the squares with the other colors mapped to the Gibbs free energies (meV/atom) above the convex hull indicate the metastable phases.

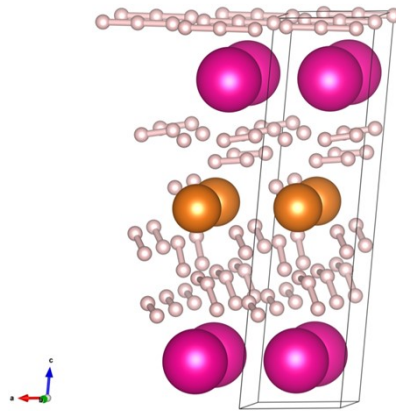

Fig. S4 Crystal structure of stable *P1* phase of  $\text{Rb}_2\text{MgH}_{18}$ . The solid lines indicate the crystal lattice. The magenta, orange and light pink spheres represent the Rb, Mg and H, respectively.

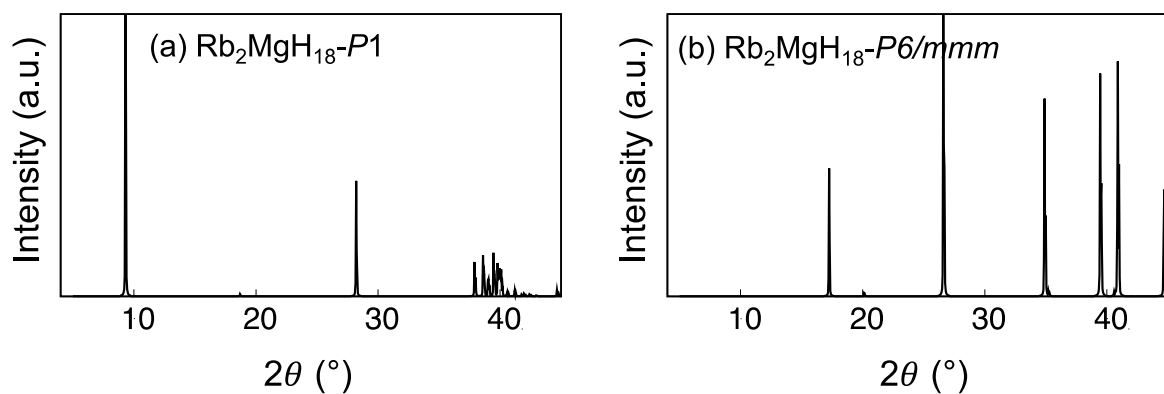

Fig. S5 Simulated X-ray diffraction patterns for (a) *P1* and (b) *P6/mmm* phases of  $\text{Rb}_2\text{MgH}_{18}$  at 250 GPa.

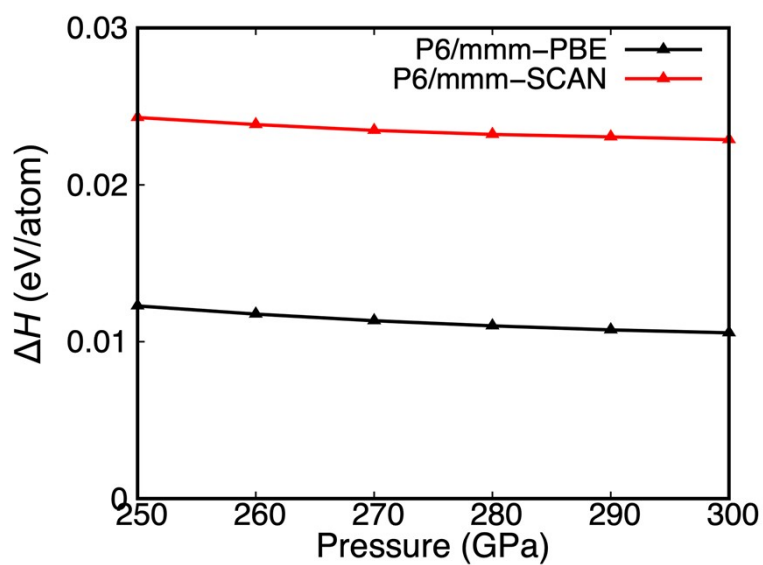

Fig. S6 Calculated enthalpies of *P6/mmm* structure with respect to *P1* structure of  $\text{Rb}_2\text{MgH}_{18}$  using PBE<sup>1</sup> and SCAN<sup>2</sup> functionals.

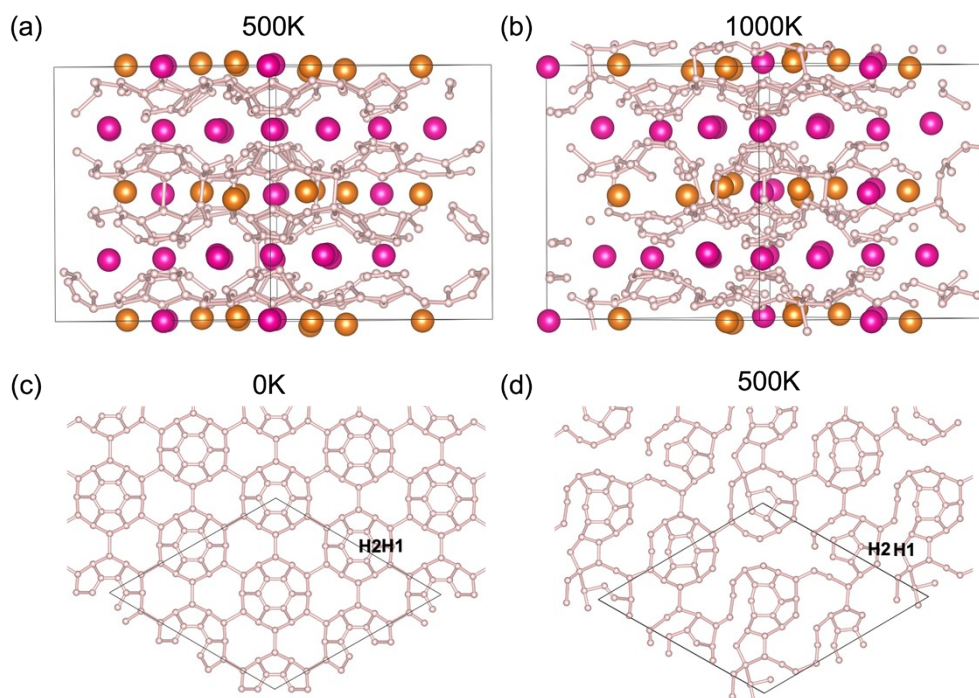

Fig. S7 Snapshots around 4000 steps of  $P6/mmm$  structure in the MD simulations under (a) 500 and (b) 1000 K. H layers in the  $P6/mmm$  structure at (c) 0 K and (d) 500 K. Two specific H were labeled as H1 and H2 to indicate the diffusion behavior of protons.

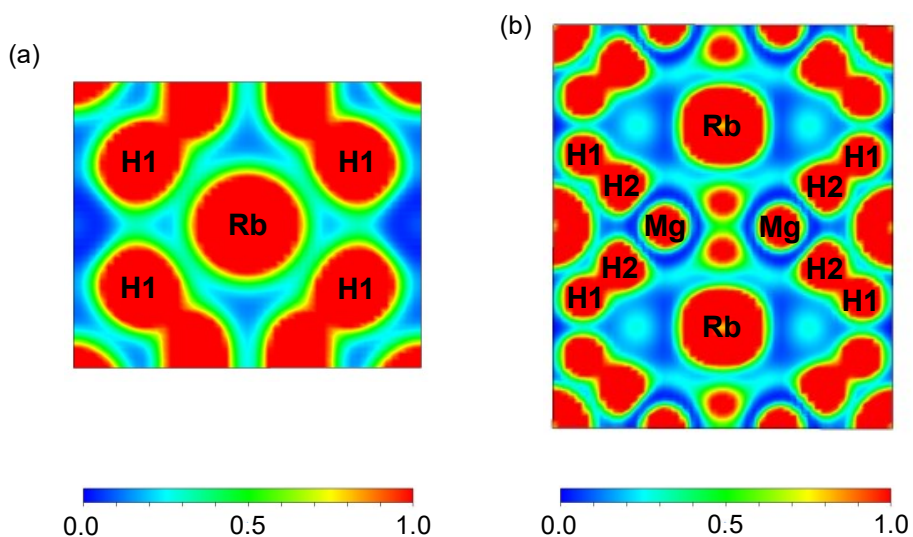

Fig. S8 2D sections of ELF on the (a)  $(1\bar{1}0)$  and (b)  $(110)$  planes in  $Rb_2MgH_{18}-P6/mmm$  structure at 235 GPa.

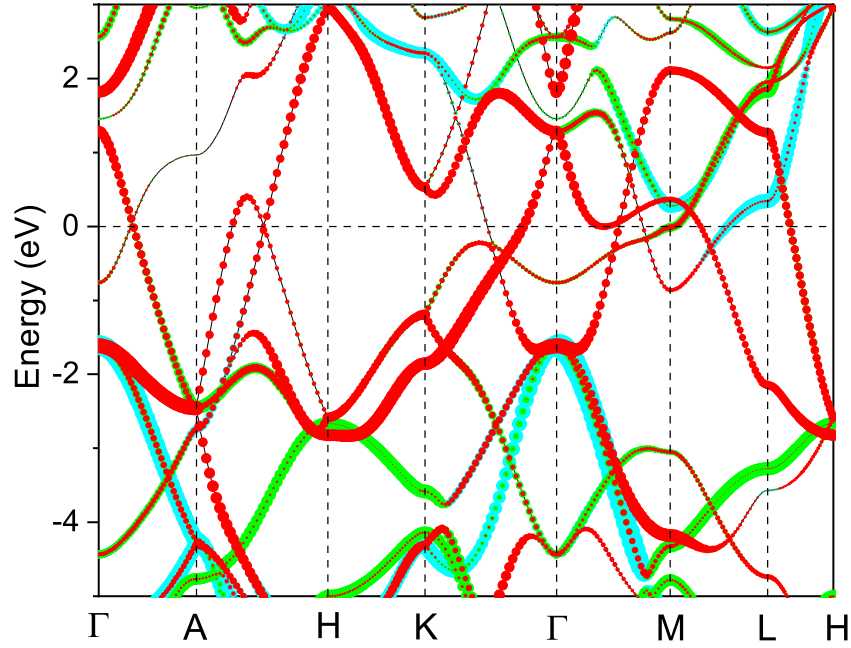

Fig. S9 Atom-projected band structure for H1, H2 and H3, which are indicated by cyan, green and red colors, respectively.

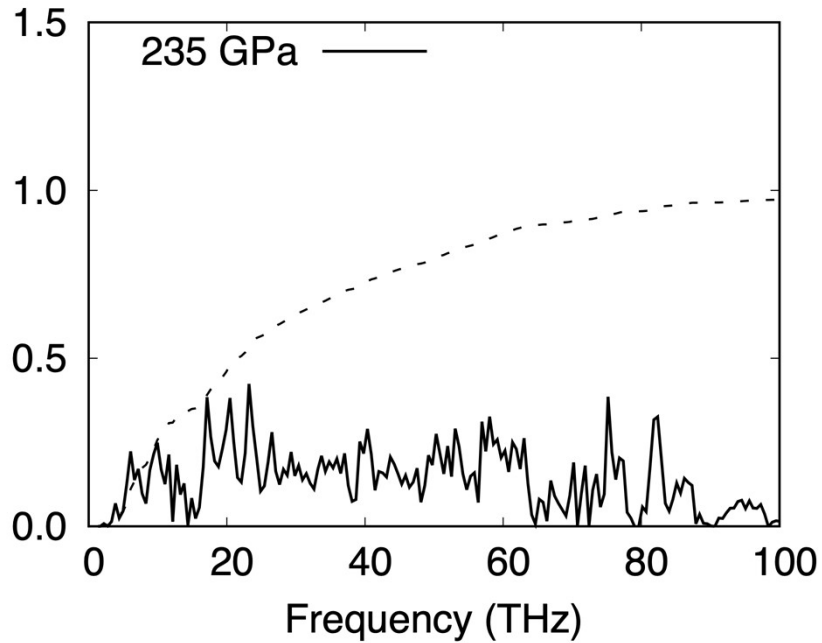

Fig. S10 Eliashberg spectral functions  $\alpha^2 F(\omega)$  (solid line) and integrated EPC constant ( $\lambda$ ) (dashed line) of  $\text{Rb}_2\text{MgH}_{18}\text{-P1}$  structure in a unit cell at 235 GPa.

**Reference:**

- 1 G. Kresse and D. Joubert, *Phys. Rev. B*, 1999, **59**, 1758–1775.
- 2 J. Sun, A. Ruzsinszky and J. P. Perdew, *Phys. Rev. Lett.*, 2015, **115**, 036402.
